# Supplementary material for: A high-performance electrocatalyst for oxygen reduction based on reduced graphene oxide modified with oxide nanoparticles, nitrogen dopants, and possible metal-N-C sites
Source: Royal Society of Chemistry journal article supplement (doi:10.1039/c3ta14153e), 2013-11-02
Supplement: c3ta14153e.pdf [file c3ta14153e.pdf]

## Supporting Information

### **A High-Performance Electrocatalyst for Oxygen Reduction Based on Reduced Graphene Oxide Modified with Oxide Nanoparticles, Nitrogen Dopants, and Possible Metal-N-C Sites**

**Yan Xie,<sup>a</sup> Huanqiao Li,<sup>a</sup> Chizhou Tang,<sup>b</sup> Shushuang Li,<sup>a</sup> Jia Li,<sup>a</sup> Yang Lv,<sup>a</sup> Xuming Wei,<sup>a</sup> and Yujiang Song<sup>\*a</sup>**

**Chemicals:** Iron (III) chloride ( $\text{FeCl}_3$ ) and cobalt (II) chloride hexahydrate ( $\text{CoCl}_2 \cdot 6\text{H}_2\text{O}$ ) were purchased from AcrosOrganics Chemical Reagent Co. 1,10-phenanthroline (phen), melamine, potassium permanganate ( $\text{KMnO}_4$ ), phosphorus (V) oxide ( $\text{P}_2\text{O}_5$ ), sodium nitrate ( $\text{NaNO}_3$ ), sodium thiosulfate pentahydrate ( $\text{Na}_2\text{S}_2\text{O}_8 \cdot 5\text{H}_2\text{O}$ ), hydrogen peroxide ( $\text{H}_2\text{O}_2$ ), sulphuric acid ( $\text{H}_2\text{SO}_4$ ) were purchased from Sinopharm Chemical Reagent Co. (Shanghai, China). Graphite powder (99+%) was purchased from Alfa Aesar. VXC-72 was supplied by Cabot Corp. (USA) and carbon nanotubes (CNTs) were from Ningbo institute of materials technology & engineering, China. All aqueous solutions were prepared with ultrapure water ( $18.2 \text{ M}\Omega \cdot \text{cm}$  at  $25 \text{ }^\circ\text{C}$ ) produced from a Millipore water system (Synergy® UV, France).

**Synthesis of graphene oxide:** Graphene oxide (GO) was synthesized from natural graphite flakes by a modified Hummers method.<sup>1</sup> Graphite powder (3 g, 100 mesh) was placed into a mixture of concentrated  $\text{H}_2\text{SO}_4$  (12 mL),  $\text{Na}_2\text{S}_2\text{O}_8 \cdot 5\text{H}_2\text{O}$  (3.26 g) and  $\text{P}_2\text{O}_5$  (2.5 g). The mixture was incubated at  $80 \text{ }^\circ\text{C}$  for 4.5 h. Next, the mixture was cooled down to room temperature and diluted with 0.5 L of  $\text{H}_2\text{O}$  and left overnight. In the following, the mixture was filtered and washed using a  $0.45 \text{ }\mu\text{m}$  millipore-filter to remove the residual acid. The product was dried under ambient condition. This pre-oxidized graphite was then subjected to oxidation by the following steps. The pretreated graphite powder was placed into concentrated  $\text{H}_2\text{SO}_4$  ( $0 \text{ }^\circ\text{C}$ , 120 mL). Next,  $\text{KMnO}_4$  (15 g) was added gradually under stirring and the temperature of the mixture was kept to be below  $20 \text{ }^\circ\text{C}$ . Next, the mixture was stirred at  $35 \text{ }^\circ\text{C}$  for 2 h, followed by the additional of 0.7 L  $\text{H}_2\text{O}$ . Shortly, 20 mL of 30%  $\text{H}_2\text{O}_2$  was added to the mixture. The resulting brilliant-yellow mixture was filtered and washed with 10 wt% HCl aqueous solution (1 L) and then washed repeatedly with  $\text{H}_2\text{O}$  until the pH of the filtrate was neutral. The GO slurry was dried in a vacuum oven at  $60 \text{ }^\circ\text{C}$  and purified by dialysis for one week.

**Synthesis of  $\text{Fe}_3\text{Co-rGO}$  Electrocatalyst:** Phen (105 mg) and melamine (66 mg) at 1:1 molar ratio were added to 100 mL of water in a round-bottom flask and the mixture was incubated at  $80 \text{ }^\circ\text{C}$ . 10 mL of 41 mM  $\text{FeCl}_3$  and 10 mL of 13 mM  $\text{CoCl}_2 \cdot 6\text{H}_2\text{O}$  was mixed at Fe/Co molar ratio of about 3:1 and heated to  $80 \text{ }^\circ\text{C}$ . 100 mL of 2 mg/mL GO aqueous solution was prepared under sonication at  $80 \text{ }^\circ\text{C}$ . In this case, the mass loading of transition metal salts on GO is 32 wt%.

Initially, the three stock solutions were mixed together and stirred for 30 min at 80 °C, followed by cooling down to room temperature in about 80 min to form dark-yellow precipitates. Next, 50 mL of 8 mg/mL NaBH<sub>4</sub> aqueous solution was added. The dark-yellow precipitates gradually turned into black, indicating the completion of the reduction of GO. The black precipitates were filtered, washed with water, and dried overnight at 65 °C. Next, the sample was heat-treated in argon (80 mL/min) at 800 °C with a heating rate of 4 °C min<sup>-1</sup> for 2 h. Finally, the heat-treated sample was leached in 0.5 M H<sub>2</sub>SO<sub>4</sub> aqueous solution at 80 °C for 30 min to remove unstable species. Next, the product was repeatedly washed with water until the filtrate pH reached 7. Finally, the sample was dried again at 65 °C prior to being used for further measurements. Controlled experiments were carried out by varying one parameter each time while keep all the others the same, including phen/melamine molar ratio (phen alone, 1:0.75, 1:1, 0.75:1, melamine alone), support type (VXC-72, rGO, carbon nanotubes), Fe/Co molar ratio (Fe alone, 1:1, 3:1, 1:3, Co alone), and heating temperature (450, 650, 775, 800, 850, and 900 °C).

**Electron Microscopy and X-ray Diffraction Studies:** The X-ray diffraction (XRD) spectrum was recorded in transmission geometry with Cu K $\alpha$  radiation ( $\lambda = 0.15432$  nm) in the range of 10-80° on Rigaku D/Max 2400 with 2 $\theta$  scan mode at a scanning rate of 5° min<sup>-1</sup>. XPS (Thermo ESCALAB 250Xi), SEM (HITACHI S5500, 30 KeV), TEM (FEI Tecnai G2 Spirit, 120 KeV), HRTEM and HAADF STEM (FEI Tecnai G2 F30 S-Twin, 300 KeV) were performed on obtained electrocatalysts. The samples for electron microscopy analysis were prepared by adding drops of colloidal suspensions onto a standard copper grid and wicking away the excess liquid with a tissue paper. The grids were air-dried for at least 2 h before imaging.

**Electrochemical Measurements:** Electrochemical measurements of cyclic voltammetry (CV), rotating disk electrode (RDE) and rotating ring-disk electrode (RRDE) were carried out by a potentiostat (760D, CH Instruments, Shanghai, China) with a conventional three-electrode electrochemical cell installed with a platinum mesh as the counter electrode and a Hg/HgO (1 M NaOH) as the reference electrode. For the preparation of working electrodes, an electrocatalyst was dispersed with the aid of sonication in a mixed solution consisted of water, ethanol, and Nafion solution (5 wt%, Dupont) ( $V_{\text{water}}:V_{\text{ethanol}}:V_{\text{Nafion}}=1:9:0.1$ ) to form a catalyst ink (3.9 mg/mL). Next, 60  $\mu$ L of the catalyst ink was dropped on the surface of glassy carbon RDE (0.19625 cm<sup>2</sup>, PINE Instruments) and then evaporated in air. For comparison, working electrodes of 20 wt% commercial Pt/C (Johnson Matthey-JM) were prepared in a similar manner. Cyclic voltammetry (CV) characterization of catalysts was carried out in N<sub>2</sub>-purged alkaline solution (0.1 M KOH) with a potential range of -0.8 to 0.2 V (vs. Hg/HgO) at a positive scanning rate of 100 mV s<sup>-1</sup>. The oxygen reduction reaction (ORR) polarization curves of RDE and RRDE (disk area: 0.2475 cm<sup>2</sup>, ring area: 0.1886 cm<sup>2</sup>, PINE Instrument) were obtained in O<sub>2</sub>-saturated 0.1 M KOH aqueous solution with a scanning range of -0.8 to 0.2 V (vs. Hg/HgO) and a positive scanning rate of 5 mV s<sup>-1</sup> at 1600 rpm. The ring potential of RRDE was kept constant at 0.2 V (vs. Hg/HgO). The peroxide percentage (%HO<sub>2</sub><sup>-</sup>) and electron transfer number (n) were evaluated based on the following equations:

$$j_{\text{lim}} = 0.62nFD^{2/3}\nu^{-1/6}C_o\omega^{1/2} \quad (1)$$

$$\%HO_2^- = 200 \times \frac{I_r/N}{(I_r/N) + I_d} \quad (2)$$

$$n = 4 \times \frac{I_d}{I_d + \frac{I_r}{N}} \quad (3)$$

In equation (1),  $j_{lim}$  is the limiting current density;  $n$  is the number of electrons transferred per oxygen molecule;  $F(96485 \text{ C mol}^{-1})$  is the Faraday constant;  $D (1.9 \times 10^{-5} \text{ cm}^2 \text{ s}^{-1})$  is the diffusion coefficient of  $\text{O}_2$  in 0.1 KOH and  $C_0 (1.2 \times 10^{-6} \text{ mol cm}^{-3})$  is the concentration of  $\text{O}_2$  in the electrolyte.  $\nu$  is the kinetic viscosity of the solution ( $0.01 \text{ cm}^2 \text{ s}^{-1}$ ); and  $\omega$  is the electrode rotation rate ( $\text{rad s}^{-1}$ ). In equation (2) and (3),  $I_r$  and  $I_d$  is the ring and disk current, respectively. The manufacturer's value of  $N$  (ring collection efficiency) is 37%. For durability test, potential cycling were conducted under a harsh degradation condition in the range of -0.4 to 0.2 V (vs. Hg/HgO) for a total number of 1500 cycles in  $\text{O}_2$ -saturated 0.1 M KOH. The potential sweep rate was  $100 \text{ mV s}^{-1}$ . After certain cycling numbers, ORR polarization curve was collected to track the degradation of electrocatalysts.

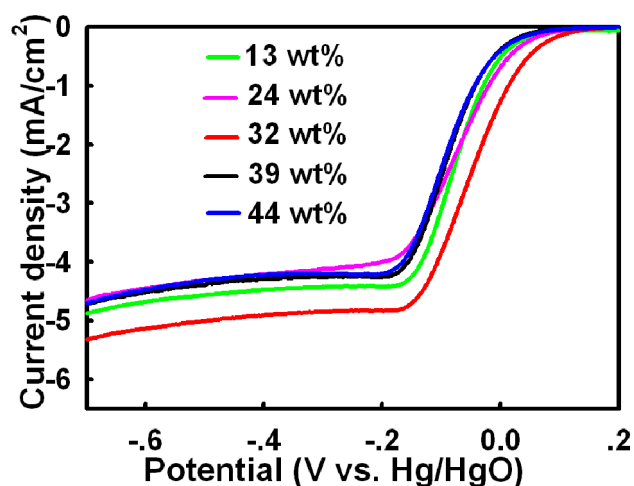

**Figure S1.** The ORR polarization curves of electrocatalyst at different theoretical loadings (transition metal salts on GO) obtained at a positive scanning rate of  $5 \text{ mVs}^{-1}$  and 1600 rpm in  $\text{O}_2$ -saturated 0.1 M KOH aqueous solution.

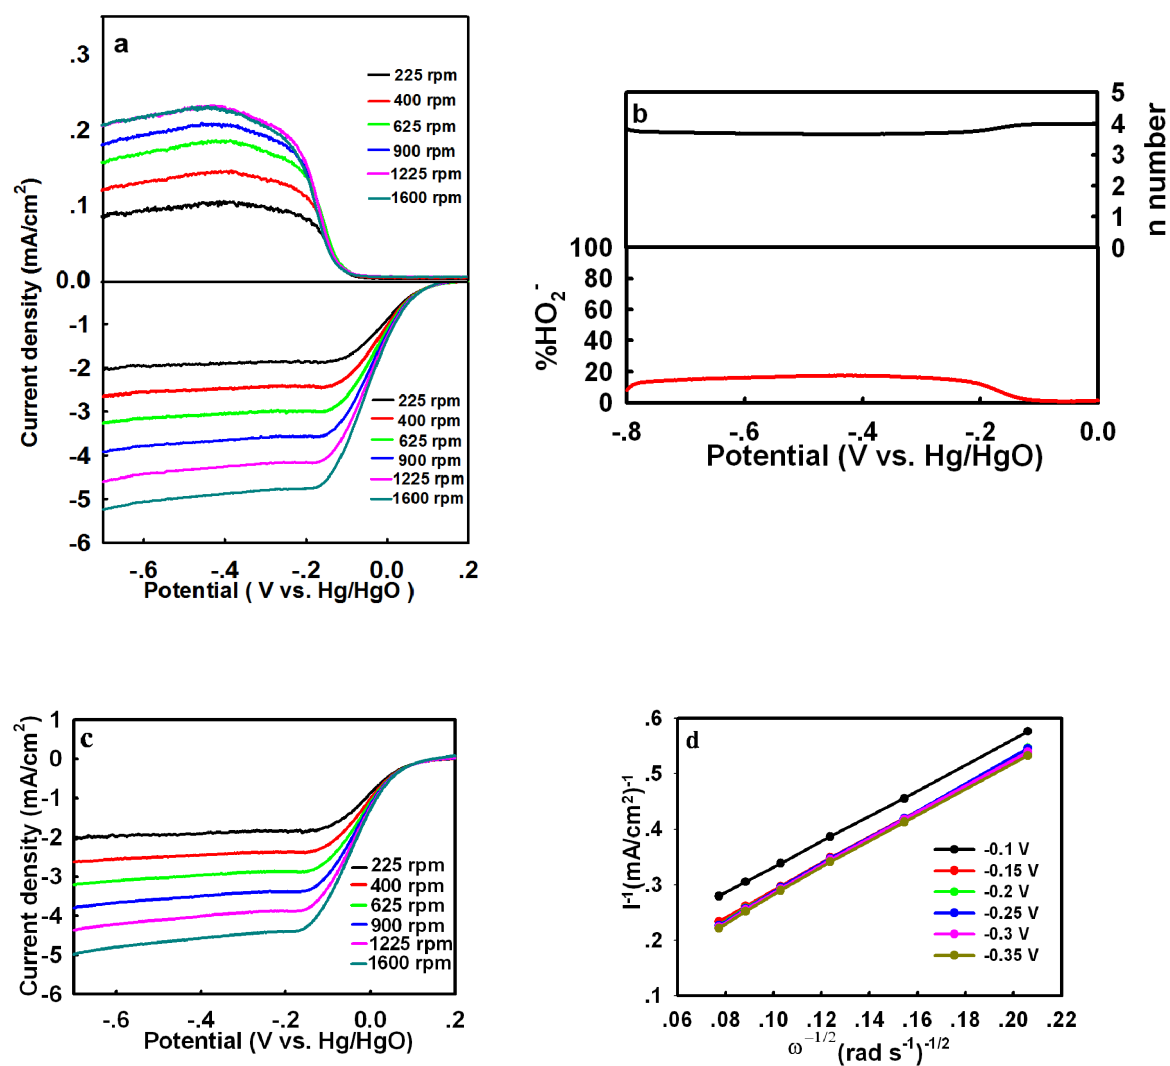

**Figure S2.**(a) Ring current density and disk current density of the Fe<sub>3</sub>Co-rGO obtained at different rpm and (b) n number and %HO<sub>2</sub> at 1600 rpm in O<sub>2</sub>-saturated 0.1 M KOH aqueous solution with a positive scanning rate of 5 mVs<sup>-1</sup>; (c) ORR polarization curves of the Fe<sub>3</sub>Co-rGO (repeated) recorded in O<sub>2</sub>-saturated 0.1 M KOH at different scan rates (225-1600 rpm); (d) K-L plots (repeated) at different potentials derived from the ORR polarization curves in (c).

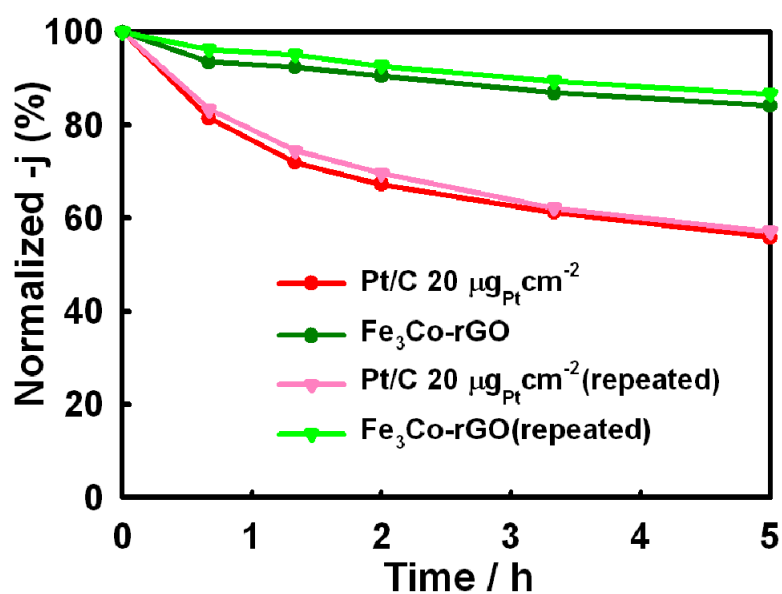

Figure S3. Current density degradation at 0 V (vs. Hg/HgO) in the potential cycling process from -0.4 to 0.2 V at a scan rate of 100 mV s<sup>-1</sup>.

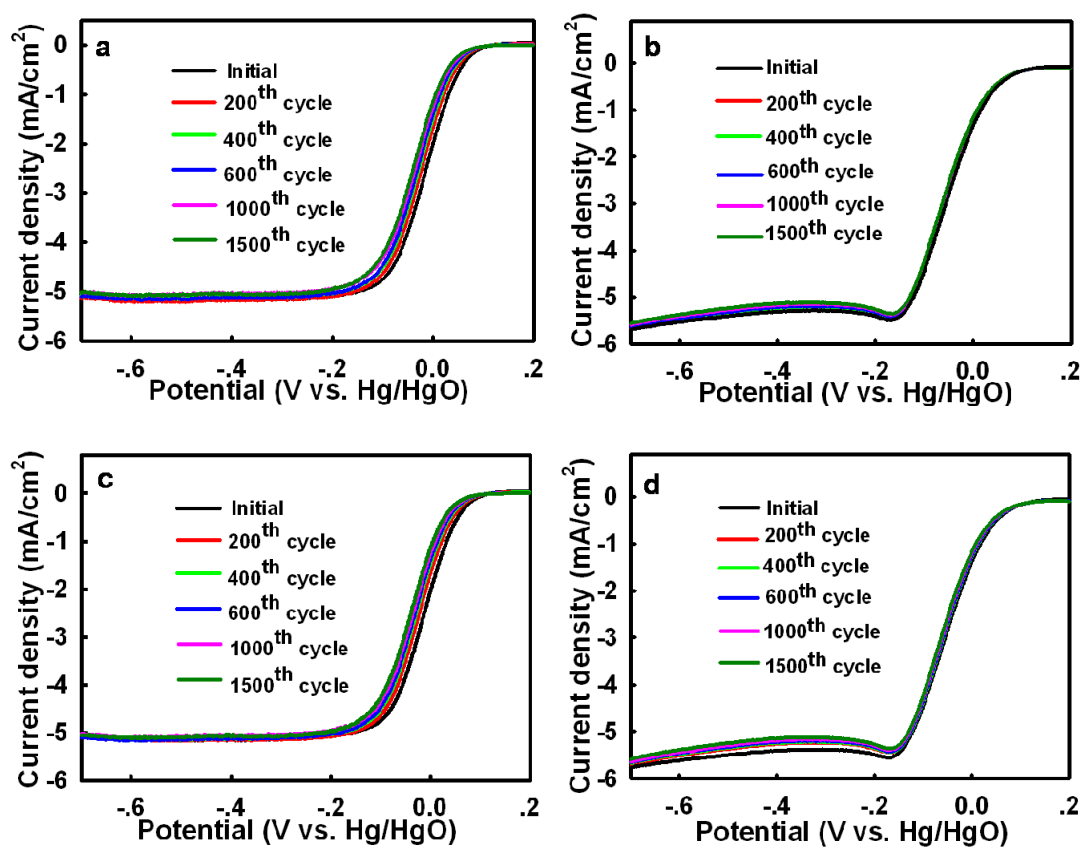

Figure S4. The ORR polarization curves of (a) the 20 wt% Pt/C, (b) the  $\text{Fe}_3\text{Co-rGO}$  (c) 20 wt% Pt/C (repeated) and (d)  $\text{Fe}_3\text{Co-rGO}$  (repeated) obtained after certain potential cycling numbers (0, 200, 400, 600, 1000 and 1500) with a positive scanning rate of 5 mVs<sup>-1</sup> at 1600 rpm in O<sub>2</sub>-saturated 0.1 M KOH aqueous solution.

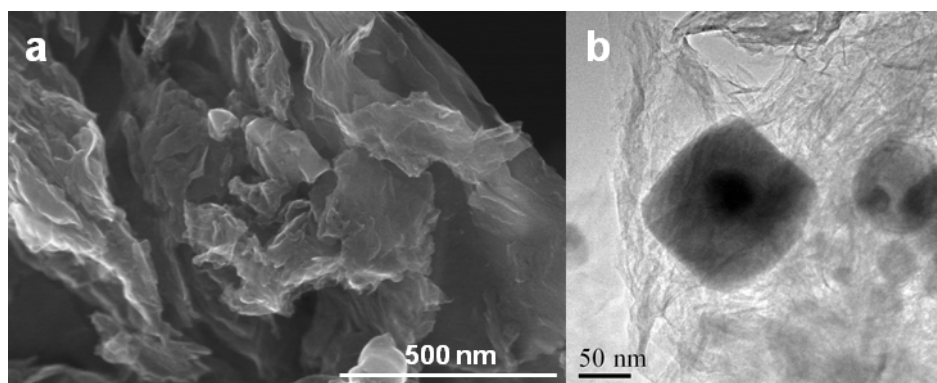

Figure S5. SEM (a) and TEM (b) image of the electrocatalyst  $\text{Fe}_3\text{Co-rGO}$ .

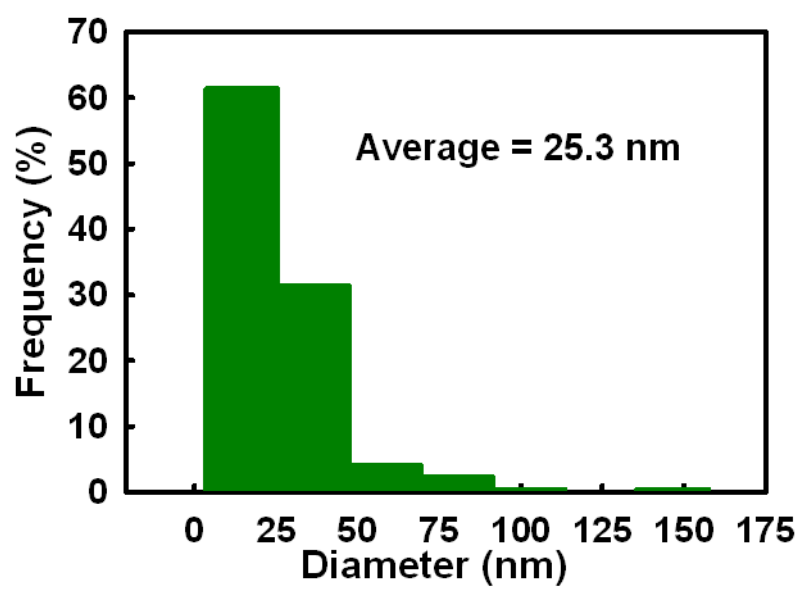

Figure S6. The size distribution of nanoparticles on rGO of the  $\text{Fe}_3\text{Co-rGO}$  by measuring randomly selected 220 individual nanostructures.

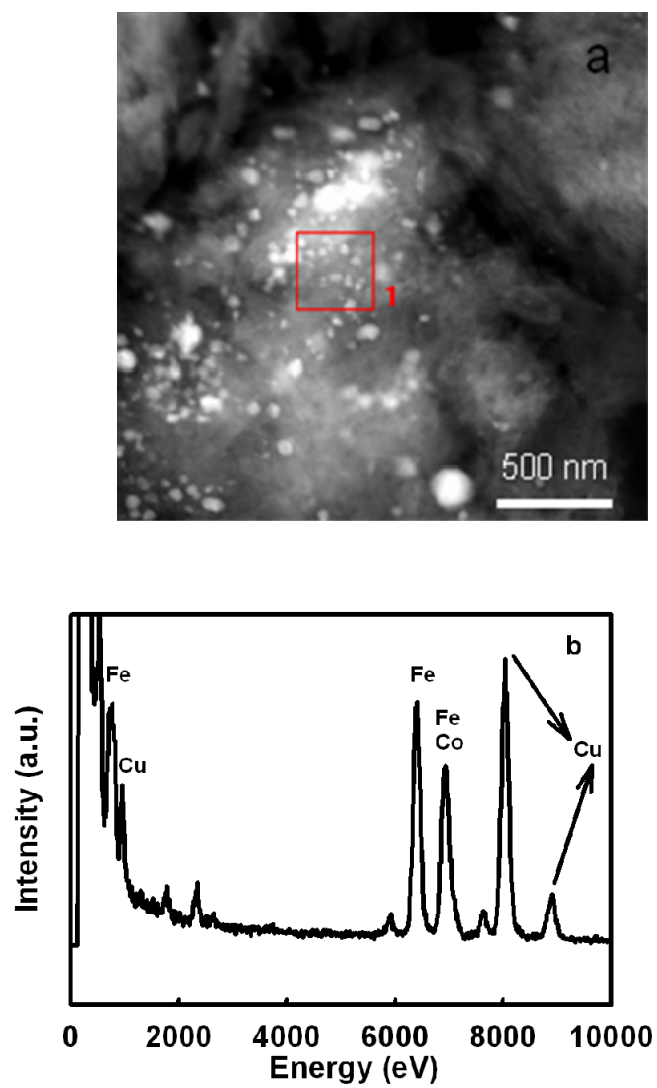

**Figure S7.** (a) HAADF STEM image of the  $\text{Fe}_3\text{Co-rGO}$ ; (b) EDX of the  $\text{Fe}_3\text{Co-rGO}$  for the selected area in (a).

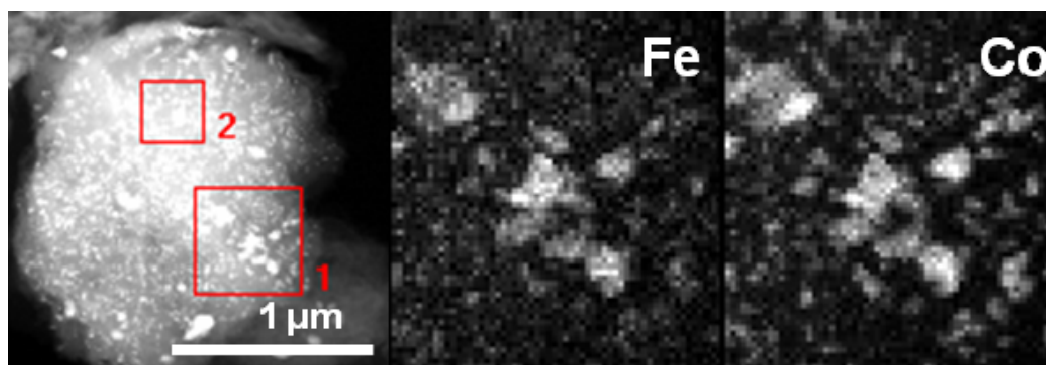

**Figure S8.** Fe and Co EDX mapping of selected area 1 for the  $\text{Fe}_3\text{Co-rGO}$ .

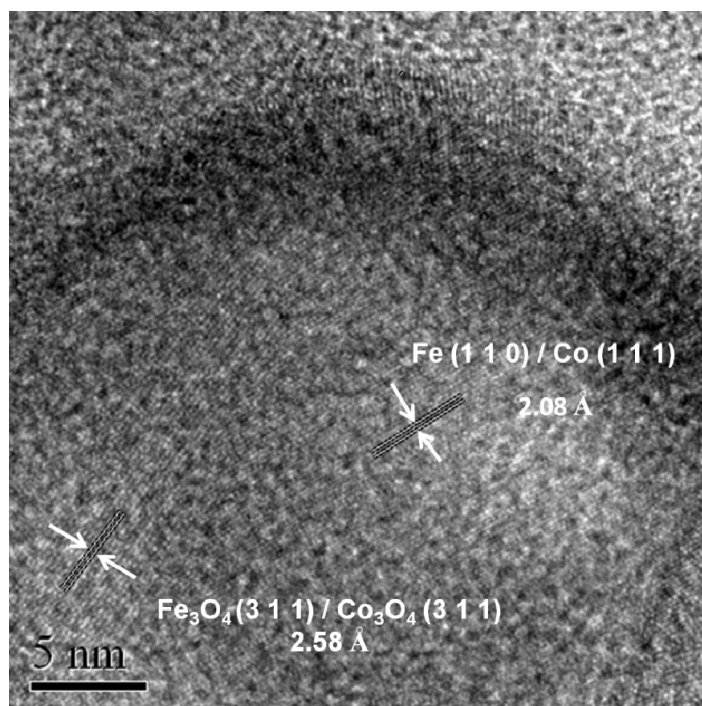

Figure S9.HR-TEM image for Fe<sub>3</sub>Co-rGO.

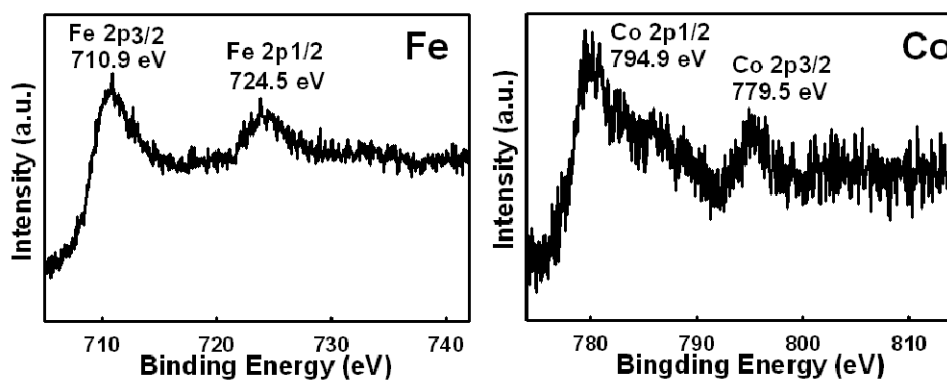

Figure S10.High resolution XPS of Fe and Co for the Fe<sub>3</sub>Co-rGO.



**Table S1.** ORR activity of recently reported highly active non-noble metal electrocatalysts in alkaline solutions compared with the 20 wt% commercial Pt/C at a metal loading of 20  $\mu\text{g}_{\text{Pt}} \text{cm}^{-2}$

| Literature                               | $C_{\text{KOH}}$<br>(M) | RDE<br>(rpm/mVs <sup>-1</sup> ) | $\Delta E_{\text{onset potential}}$<br>(mV) | $\Delta E_{1/2}$<br>(mV) | H <sub>2</sub> O <sub>2</sub><br>(%) |
|------------------------------------------|-------------------------|---------------------------------|---------------------------------------------|--------------------------|--------------------------------------|
| This study                               | 0.1                     | 1600/5                          | 5                                           | -23                      | ~18                                  |
| Nat. Mater.,<br>2011, 10, 780            | 0.1                     | 1600/5                          | unknown                                     | -30                      | ~6                                   |
| J. Am. Chem. Soc.,<br>2012, 134, 15849   | 1                       | 1600/5                          | unknown                                     | -35                      | ~12                                  |
| J. Am. Chem. Soc.,<br>2012, 134, 3517    | 0.1/1                   | 1600/5                          | unknown                                     | -20                      | ~10                                  |
| Angew. Chem. Int.<br>Ed., 2011, 50, 3257 | 1                       | 1600/5                          | 10                                          | unknown                  | unknown                              |

## References:

- 1 a) C. Vallés, C. Drummond, H. Saadaoui, C. A. Furtado, M. He, O. Roubeau, L. Ortolani, M. Monthieux, A. Pénicaud, *J Am. Chem. Soc.*, 2008, **130**, 15802; b) W. S. Hummers, R. E. Offeman, *J Am. Chem. Soc.*, 1958, **80**, 1339.
- 2 S. Wang, D. Yu, L. Dai, D. W. Chang, J. B. Baek, *ACS Nano*, 2011, **5**, 6202.
